# Supplementary material for: Novel mechanisms for crotonaldehyde-induced lung edema
Source: PubMed Central journal article supplement (PMC5663532; doi:10.18632/oncotarget.17840), 2017-05-12
Supplement: oncotarget-08-83509-s001.pdf [file oncotarget-08-83509-s001.pdf]

## Novel mechanisms for crotonaldehyde-induced lung edema

### SUPPLEMENTARY FIGURES

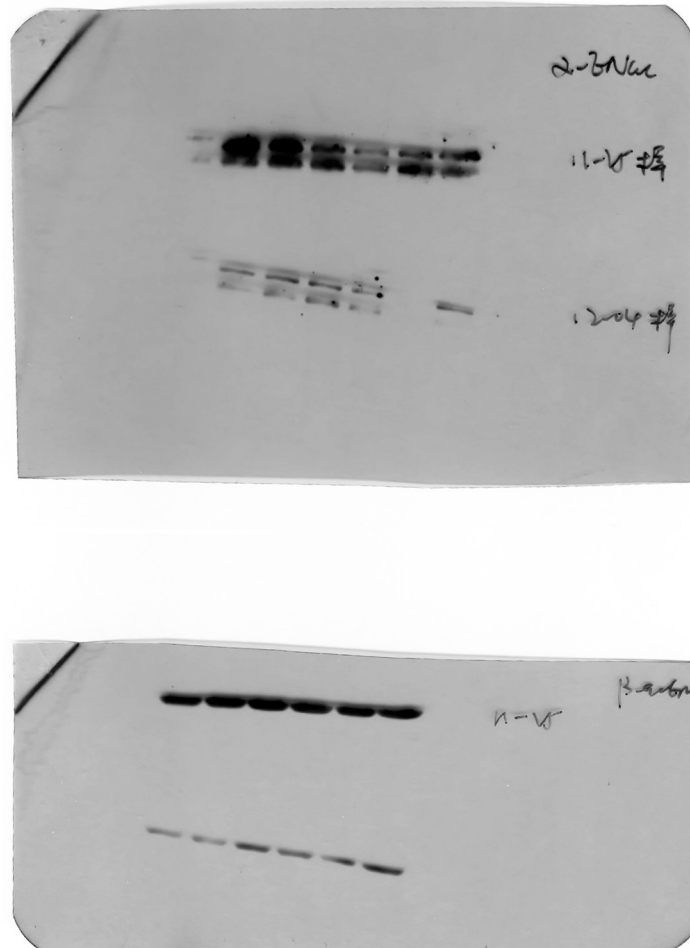

**Supplementary Figure 1: The full-length blots/gels of  $\alpha$ -ENaC protein extracted from H441 cells exposed to 80  $\mu$ M crotonaldehyde for 0-24 h. Blots were immunostained with antibody to  $\alpha$ -ENaC, or to  $\beta$ -actin as a loading control.**

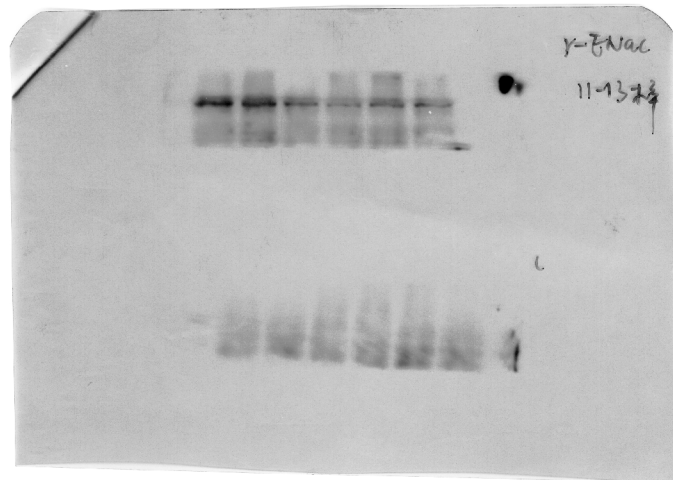

**Supplementary Figure 2: The full-length blots/gels of  $\gamma$ -ENaC protein extracted from H441 cells exposed to 80  $\mu$ M crotonaldehyde for 0-24 h. Blots were immunostained with antibody to  $\gamma$ -ENaC.**

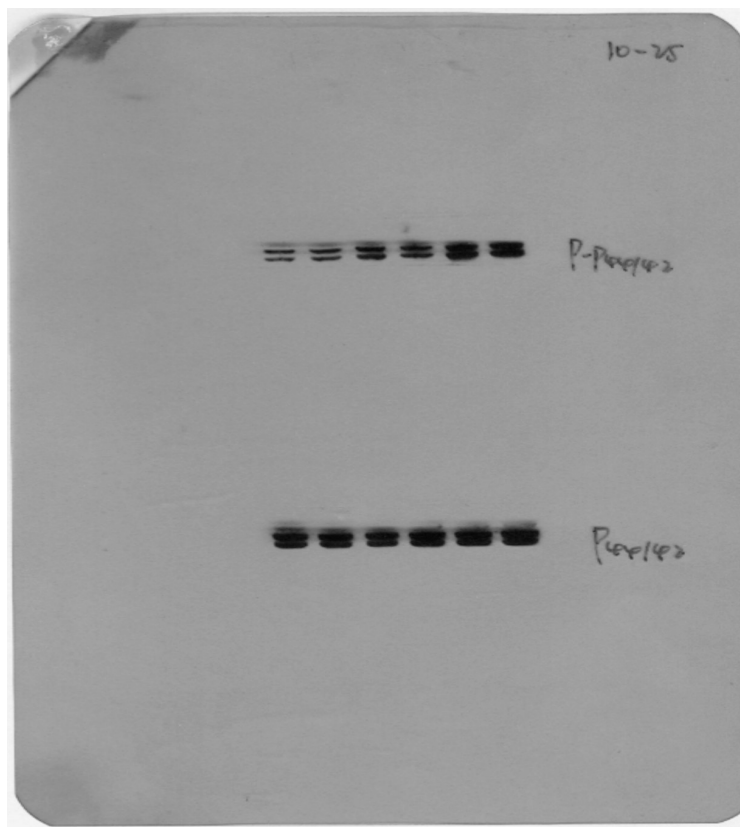

**Supplementary Figure 3: The full-length blots/gels of phosphorylated ERK1/2 in protein extracted from H441 cells exposed to 80  $\mu$ M crotonaldehyde for 0-90 min. Blots were immunostained with total ERK1/2 as a loading control.**
